# Supplementary material
Source: PubMed Central journal article supplement (PMC6161407)
Supplement: supplementary_table_s1.pdf [file supplementary_table_s1.pdf]

Supplementary Table S1

Primers for qPCR

|                | Forward               | Reverse                |
|----------------|-----------------------|------------------------|
| <b>PFK1</b>    | AGCTGCCTACAACCTGGTGA  | TCCACTCAGAACGGAAGGTGT  |
| <b>PFKP</b>    | GCATGGGTATCTACGTGGGG  | CTCTGCGATGTTTGAGCCTC   |
| <b>PGD</b>     | GTGGCCCCACATCAAGACC   | GTCCCCATACTCTATCCCGTT  |
| <b>PGLS</b>    | CAGACTGCCGATCCCAGAAAG | CCCTTGGAATGCCTGTCTCA   |
| <b>G6PD</b>    | CGAGGCCGTCACCAAGAAC   | GTAGTGGTCGATGCGGTAGA   |
| <b>SP1</b>     | AGTTCCAGACCGTTGATGGG  | GTTTGCACCTGGTATGATCTGT |
| <b>β-ACTIN</b> | TCGTGCGTGACATTAAGGAG  | GTCAGGCAGCTCGTAGCTCT   |
